# Supplementary material for: Delocalization energy retrieved from the current density tensor
Source: Royal Society of Chemistry journal article supplement (doi:10.1039/c9cp00117d), 2019-01-01
Supplement: c9cp00117d1.pdf [file c9cp00117d1.pdf]

# Delocalization Energy Retrieved from the Current Density Tensor Supporting Information

Guglielmo Monaco\* and Riccardo Zanasi

*Dipartimento di Chimica e Biologia "A. Zambelli", Università degli Studi di Salerno,  
Via Giovanni Paolo II, 132, Fisciano 84084 SA, Italy.*

E-mail: gmonaco@chem.unisa.it

Fax: +39 89 969603

## Computational details

Molecular geometries of the isomers of benzene **16**, **102**, **185**, **187**, **199**, **213**, where numbers refer to ref.<sup>1</sup> (which in turn adopted the numbering of ref.<sup>2</sup>), have been obtained at the B3LYP/aug-cc-pVTZ level, starting from the output reported in the Supporting Information of ref.<sup>1</sup> Re-optimization led to no significant energy changes, but allowed defining the molecular symmetry, which turned out  $C_s$  in all cases, but benzene ( $D_{6h}$ ). Molecules magnetic susceptibility has been computed by GIAO using the 175,974 points pruned grid available in Gaussian 09.

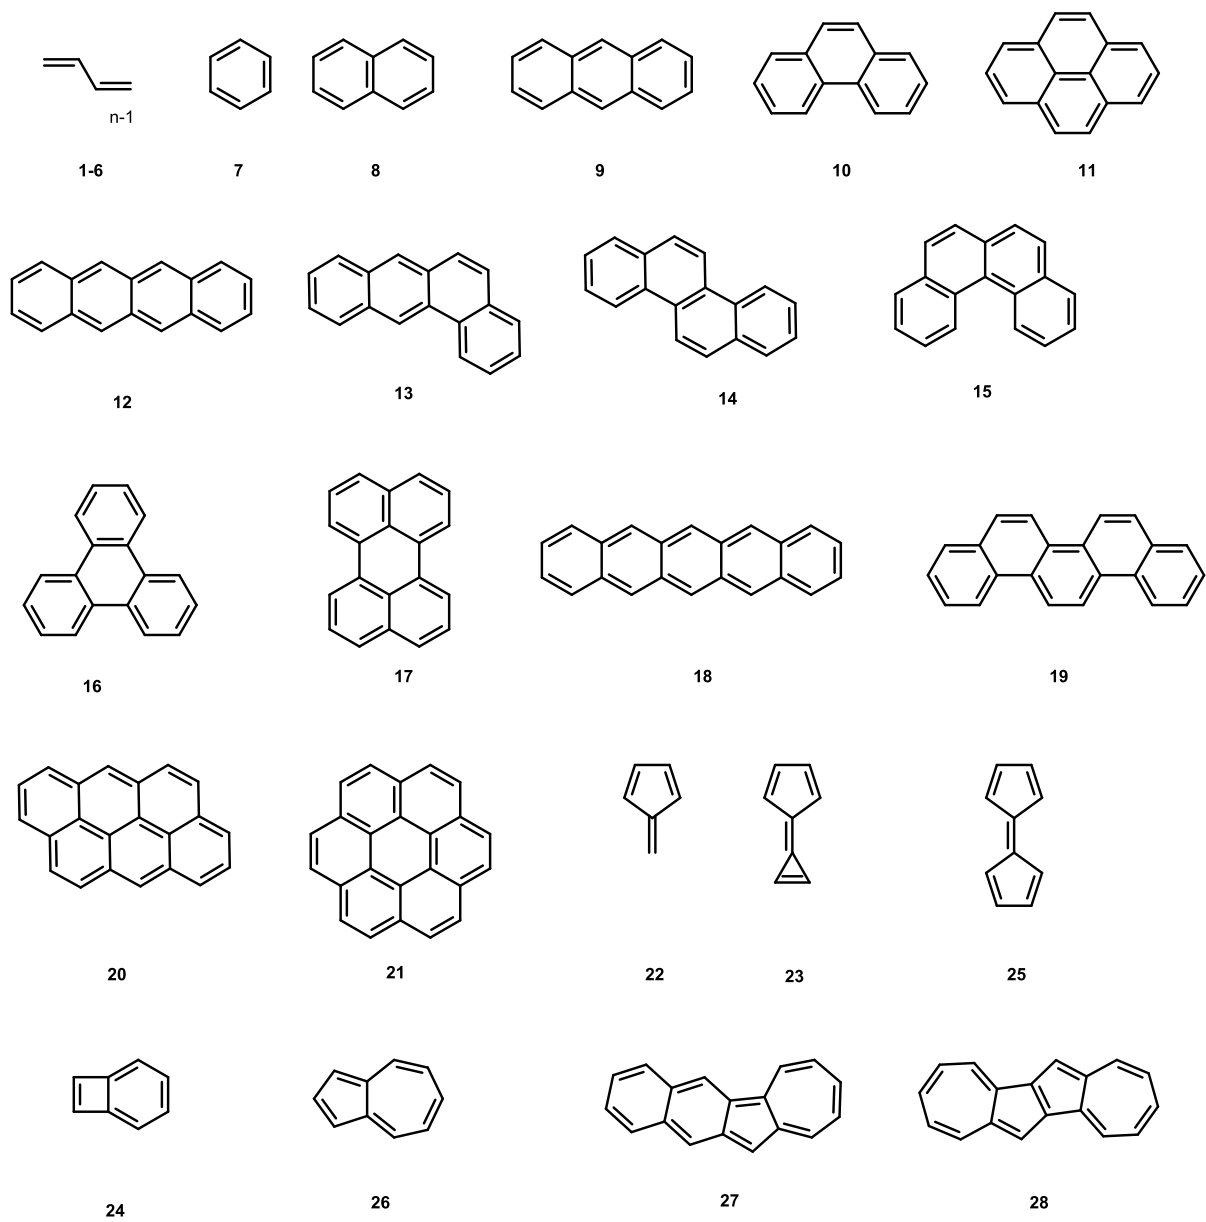

Figure S1: Sketches of the molecules listed in Table 1.

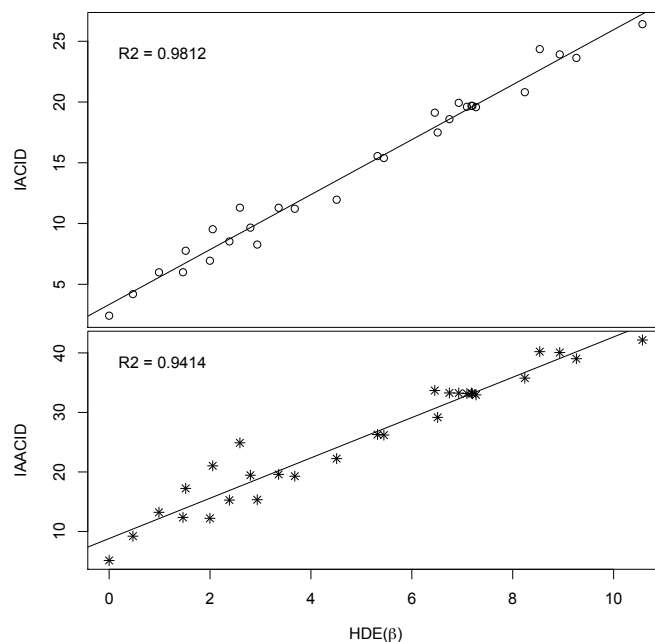

Figure S2: Scatter plots of integrated anisotropies versus the Hückel delocalization energies for the systems listed in Table 1.

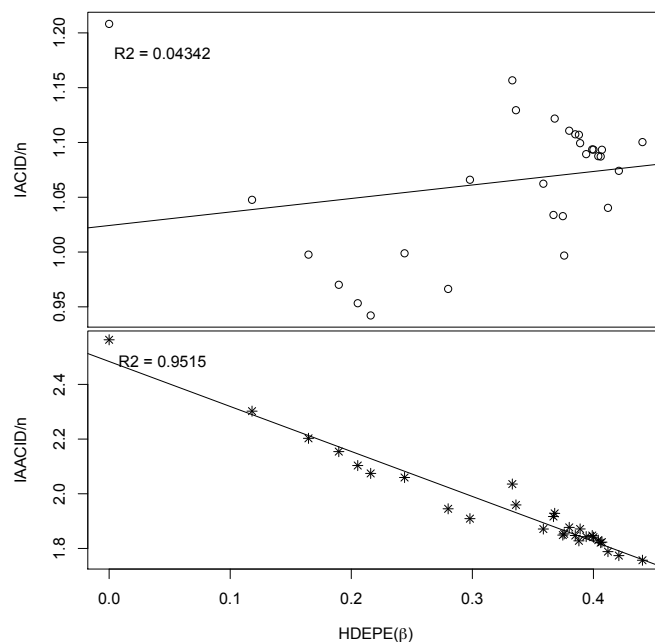

Figure S3: Scatter plots of normalized integrated anisotropies versus the Hückel delocalization energies per electron for the systems listed in Table 1;  $n$  is the number of  $\pi$  electrons, matching the number of C atoms in our set of molecules.

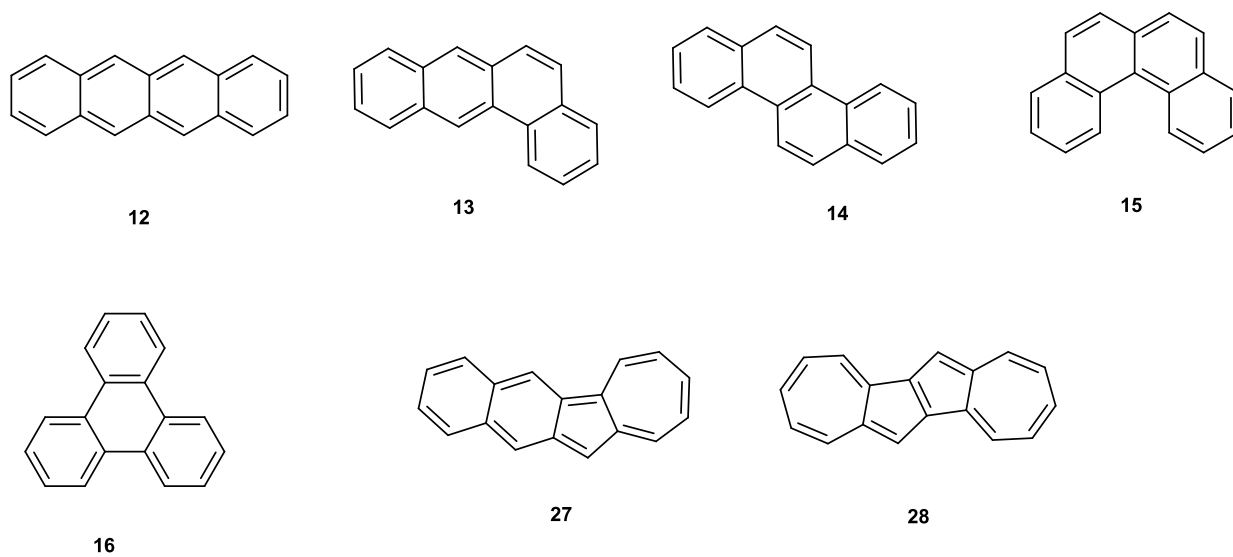

Figure S4: Sketches of the molecules listed in Table 1 with formula  $C_{18}H_{12}$ .

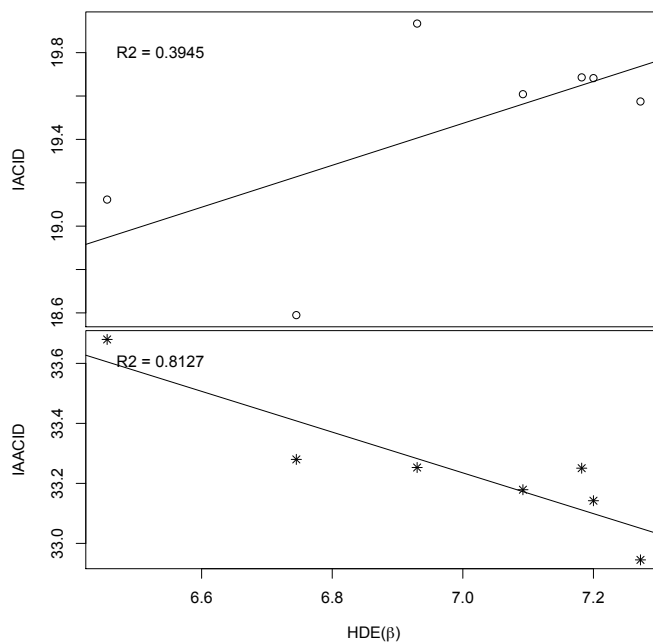

Figure S5: Scatter plots of integrated anisotropies versus the Hückel delocalization energies for the 7  $C_{18}H_{12}$  isomers among the molecules considered in the paper.

Table S1: Least squares coefficients and their standard errors for the four linear regressions discussed in the text.

| $x$   | $y$                                                         | parameter | ACID-based |            | AACID-based |            |
|-------|-------------------------------------------------------------|-----------|------------|------------|-------------|------------|
| HDE   | IACID   IAACID                                              | intercept | 3.33       | $\pm 0.34$ | 8.8         | $\pm 0.9$  |
|       |                                                             | slope     | 2.26       | $\pm 0.06$ | 3.4         | $\pm 0.2$  |
| HDE   | IACID   IAACID<br>(C <sub>18</sub> H <sub>12</sub> isomers) | intercept | 12.71      | $\pm 3.74$ | 38.0        | $\pm 1.0$  |
|       |                                                             | slope     | 0.97       | $\pm 0.54$ | -0.68       | $\pm 0.15$ |
| HDEPE | IACID/ $n$   IAACID/ $n$                                    | intercept | 1.02       | $\pm 0.04$ | 2.48        | $\pm 0.02$ |
|       |                                                             | slope     | 0.12       | $\pm 0.11$ | -1.65       | $\pm 0.07$ |
| HDE   | $\Delta$ IACID   $\Delta$ IAACID                            | intercept | -1.00      | $\pm 0.25$ | -0.3        | $\pm 0.2$  |
|       |                                                             | slope     | -0.20      | $\pm 0.04$ | -1.81       | $\pm 0.03$ |

Table S2: Results for the isomers of benzene computed as described in the Computational Details. Energies and integrated anisotropies in atomic units. Values of magnetizabilities in  $10^{-30}$  J T<sup>-2</sup>.

| Isomer     | IACID | IAACID | $E$        | $\xi_{iso}$ | $\Delta\xi$ | $\xi_1$ | $\xi_2$ | $\xi_3$ |
|------------|-------|--------|------------|-------------|-------------|---------|---------|---------|
| <b>16</b>  | 6.84  | 12.69  | -232.33729 | -932.1      | -1083.2     | -571.0  | -571.1  | -1654.3 |
| <b>102</b> | 13.15 | 15.89  | -232.18304 | -495.5      | -1103.6     | -468.7  | 213.5   | -1231.2 |
| <b>199</b> | 13.21 | 16.21  | -232.17393 | -471.8      | -1086.8     | 261.5   | -480.6  | -1196.4 |
| <b>213</b> | 5.33  | 14.27  | -232.11059 | -1153.5     | -88.3       | -1082.4 | -1212.3 | -1165.7 |
| <b>187</b> | 13.58 | 16.24  | -232.05951 | -404.6      | -1030.1*    | 524.2   | -1091.3 | -646.7  |
| <b>185</b> | 13.65 | 16.11  | -232.05288 | -430.3      | -1098.4     | -1162.6 | -700.8  | 572.4   |

\*For isomer **187** we do not recover a magnetizability anisotropy larger than benzene, as claimed in ref.<sup>1</sup>

## References

- (1) Janda, T.; Foroutan-Nejad, C. *ChemPhysChem* **2018**, *19*, 2357–2363.
- (2) Dinadayalane, T. C.; Priyakumar, U. D.; Sastry, G. N. *J. Phys. Chem. A* **2004**, *108*, 11433–11448.
